# Supplementary material
Source: PubMed Central journal article supplement (PMC4044860)
Supplement: supp_pp.114.238410_238410supplemental.pdf [file supp_pp.114.238410_238410supplemental.pdf]

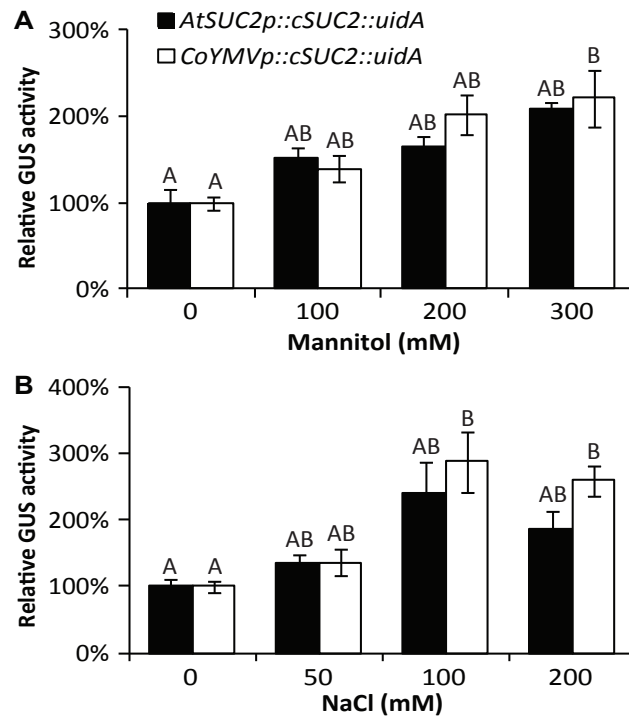

**Supplemental Figure 1.** Comparison of *CoYMVp* and *AtSUC2p* phloem-specific promoter activities in the presence of different stimuli (See also, Figure 1). A, Quantitative GUS analysis in *CoYMVp::cSUC2::uidA* and *AtSUC2p::cSUC2::uidA* plants grown on MS medium in the presence of 0 mM, 100 mM, 200 mM, and 300 mM mannitol to mimic osmotic / drought stress, relative to 0 mM mannitol. B, GUS activity in the presence of 0 mM, 50 mM, 100 mM, and 200 mM NaCl to mimic salt stress, expressed relative to 0 mM NaCl. Variation is expressed as standard error; n = 6; different letters represent significant differences based on univariate ANOVA with Scheffe post-hoc analysis at the 0.05 level.

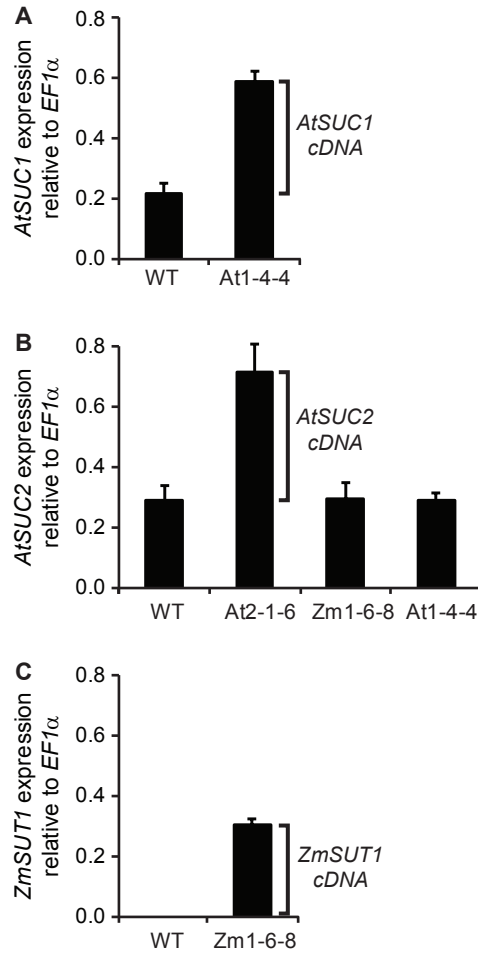

**Supplemental Figure 2.** RT-qPCR analysis of *AtSUC1*, *AtSUC2*, and *ZmSUT1* transcript levels in WT plants and WT lines with additional companion cell-specific *SUT* expression. A, *AtSUC1* transcript abundance in WT and line At1-4-4, with additional *AtSUC1* expression attributed to the transgene. B, *AtSUC2* transcript abundance in WT and lines At1-4-4, At2-1-6, and Zm1-6-8, with the additional expression in At2-1-6 attributed to the transgene. C, *ZmSUT1* transcript levels in WT and line Zm1-6-8, which additional expression in At2-1-6 attributed to the transgene.

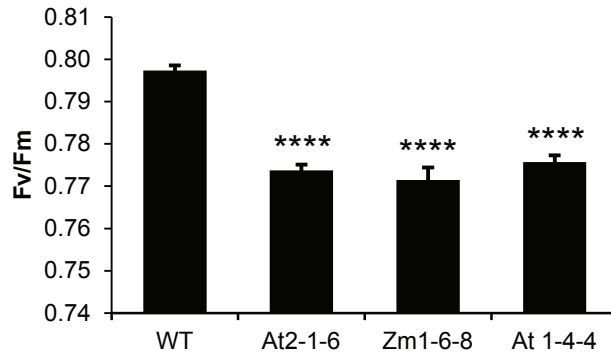

**Supplemental Figure 3.** Photosynthesis is reduced in *SUT* over-expressing lines. Photosynthesis was measured by imaging pulsed amplitude modulated fluorescence ( $F_v/F_m$ ) on dark adapted leaves and revealed reductions consistent with feedback inhibition by accumulation of sugar in the rosettes;  $n = 12$  measurements (4 fully-expanded leaves from 3 plants of each line); variation is represented as SE; significant difference from WT are based on Student's T-Test: \*\*\*\*,  $P \leq 1 \times 10^{-5}$ .

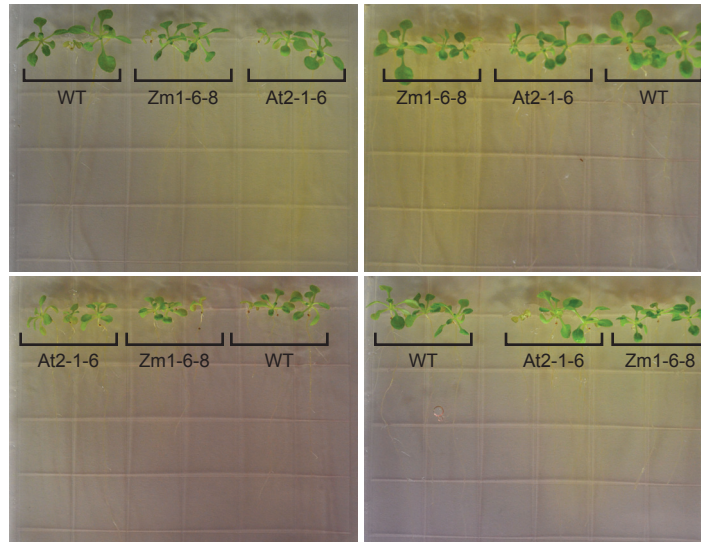

**Supplemental Figure 4.** Increased rhizosphere acidification by plants with additional *SUT* expression in companion cells, as demonstrated by the pH indicator dye bromocresol blue. The starting pH of the  $\frac{1}{2}$  strength MS medium (without added Suc or P) was 6.8. Transition of the dye from blue to yellow indicates a pH drop to below 5.0, and is most evident in the vicinity of At2-1-6 and Zm1-6-8 roots but is minimal in the vicinity of WT roots. Each panel represents a separate plate prepared from the same batch of media and plates were incubated at the same time in the same growth chamber. Each panel thus represents a biological replicate.

**Supplemental Table 1:** Cross reference for the most prevalent “Type”, “Group” and “Clade” designations used by different authors, and the biochemical characteristics and apparent functions of representative members (adapted from (Ayre, 2011)).

| Type <sup>1</sup> | Group <sup>2</sup><br>/ Clade <sup>3</sup> | Distribution,<br>function             | Affinity (K <sub>0.5</sub><br>mM) in yeast<br>or (oocytes) | Representative<br>members                     | Location, apparent<br>physiological function                                                                                    | Antisense/mutant phenotype                                                                                | Reference <sup>4</sup>                                                                                    |
|-------------------|--------------------------------------------|---------------------------------------|------------------------------------------------------------|-----------------------------------------------|---------------------------------------------------------------------------------------------------------------------------------|-----------------------------------------------------------------------------------------------------------|-----------------------------------------------------------------------------------------------------------|
| Type I            | Group 2<br>/ SUT1                          | Dicot, high<br>affinity<br>uptake     | 0.5<br>0.77 (1.44)<br>0.5 (0.066)<br>1.0 (0.5)             | AtSUC1<br>AtSUC2<br>AtSUC9<br>Solanaceae SUT1 | Numerous sinks, uptake<br>Phloem, loading/retrieval<br>Broadly, high affinity retrieval<br>Phloem & sinks,<br>loading/retrieval | Pollen defects<br>Stunted, accumulate carbohydrate<br>Early flowering<br>Stunted, accumulate carbohydrate | (Feuerstein et al., 2010)<br>(Srivastava et al., 2008)<br>(Sivitz et al., 2007)<br>(Schmitt et al., 2008) |
| Type<br>IIA       | Group 3<br>/ SUT2                          | Monocot and<br>Dicot, low<br>affinity | Not active<br>1.9                                          | Solanaceae SUT2<br>AtSUC3/AtSUT2              | Sink organs, pollen tube growth<br>Sinks & wounded tissue                                                                       | Reduced pollen growth<br>None apparent                                                                    | (Hackel et al., 2006)<br>(Meyer et al., 2004)                                                             |
| Type IIB          | Group 1<br>/ SUT3                          | Monocot,<br>high affinity<br>uptake   | (7.5)<br>(3.7)                                             | OsSUT1<br>ZmSUT1                              | Broadly, seed filling, not<br>loading<br>Phloem & sinks, loading                                                                | Shriveled seeds<br>Stunted, accumulate carbohydrate                                                       | (Scofield et al., 2002)<br>(Slewinski et al., 2009)                                                       |
|                   | Group 5<br>/ SUT5                          | Monocot,<br>high affinity<br>uptake   | (2.3)                                                      | OsSUT5                                        | Broadly                                                                                                                         | Unknown                                                                                                   | (Sun et al., 2010)                                                                                        |
| Type III          | Group 4<br>/ SUT4                          | Dicot and<br>monocot,<br>low affinity | Unknown<br>(16.0)<br>6.0                                   | HvSUT2<br>LjSUT4<br>StSUT4                    | mesophyll, tonoplast transport<br>Nodules, tonoplast transport<br>Broadly, plasma membrane                                      | Unknown<br>Unknown<br>Early flowering & tuberization                                                      | (Endler et al., 2006)<br>(Reinders et al., 2008)<br>(Chincinska et al., 2008)                             |

1. Based on (Aoki et al., 2003; Reinders et al., 2012)

2. Based on (Braun and Slewinski, 2009)

3. Based on (Kühn and Grof, 2010)

4. Only the most recent or thorough references are provided here, see (Ayre, 2011) for more thorough descriptions and citations.

**Literature cited for Supplemental Table 1:**

- Aoki N, Hirose T, Scofield GN, Whitfeld PR, Furbank RT** (2003) The sucrose transporter gene family in rice. *Plant Cell Physiol* **44**: 223-232
- Ayre BG** (2011) Membrane-transport systems for sucrose in relation to whole-plant carbon partitioning. *Mol Plant* **4**: 377-394
- Braun DM, Slewinski TL** (2009) Genetic control of carbon partitioning in grasses: Roles of sucrose transporters and *TIE-DYED* loci in phloem loading. *Plant Physiol* **149**: 71-81
- Chincinska IA, Liesche J, Krügel U, Michalska J, Geigenberger P, Grimm B, Kühn C** (2008) Sucrose transporter StSUT4 from potato affects flowering, tuberization, and shade avoidance response. *Plant Physiol* **146**: 515-528
- Endler A, Meyer S, Schelbert S, Schneider T, Weschke W, Peters SW, Keller F, Baginsky S, Martinoia E, Schmidt UG** (2006) Identification of a vacuolar sucrose transporter in barley and *Arabidopsis* mesophyll cells by a tonoplast proteomic approach. *Plant Physiol* **141**: 196-207
- Feuerstein A, Niedermeier M, Bauer K, Engelmann S, Hoth S, Stadler R, Sauer N** (2010) Expression of the *AtSUC1* gene in the female gametophyte, and ecotype-specific expression differences in male reproductive organs. *Plant Biol* **12**: 105-114
- Hackel A, Schauer N, Carrari F, Fernie AR, Grimm B, Kühn C** (2006) Sucrose transporter LeSUT1 and LeSUT2 inhibition affects tomato fruit development in different ways. *Plant J* **45**: 180-192
- Kühn C, Grof CPL** (2010) Sucrose transporters of higher plants. *Curr Opin Plant Biol* **13**: 288-298
- Meyer S, Lauterbach C, Niedermeier M, Barth I, Sjolund RD, Sauer N** (2004) Wounding enhances expression of *AtSUC3*, a sucrose transporter from *Arabidopsis* sieve elements and sink tissues. *Plant Physiol* **134**: 684-693
- Reinders A, Sivitz AB, Starker CG, Gantt JS, Ward JM** (2008) Functional analysis of LjSUT4, a vacuolar sucrose transporter from *Lotus japonicus*. *Plant Mol Biol* **68**: 289-299
- Reinders A, Sivitz AB, Ward JM** (2012) Evolution of plant sucrose uptake transporters (SUTs). *Front Plant Sci* **3**
- Schmitt B, Stadler R, Sauer N** (2008) Immunolocalization of Solanaceous SUT1 proteins in companion cells and xylem parenchyma: New perspectives for phloem loading and transport. *Plant Physiol* **148**: 187-199
- Scofield GN, Hirose T, Gaudron JA, Upadhyaya NM, Ohsugi R, Furbank RT** (2002) Antisense suppression of the rice sucrose transporter gene, *OsSUT1*, leads to impaired grain filling and germination but does not affect photosynthesis. *Funct Plant Biol* **29**: 815-826
- Sivitz AB, Reinders A, Johnson ME, Krentz AD, Grof CPL, Perroux JM, Ward JM** (2007) *Arabidopsis* sucrose transporter AtSUC9. High-affinity transport activity, intragenic control of expression, and early flowering mutant phenotype. *Plant Physiol* **143**: 188-198
- Slewinski TL, Meeley R, Braun DM** (2009) Sucrose transporter1 functions in phloem loading in maize leaves. *J Exp Bot* **60**: 881-892
- Srivastava AC, Ganesan S, Ismail IO, Ayre BG** (2008) Functional characterization of the *Arabidopsis* AtSUC2 Sucrose/H<sup>+</sup> symporter by tissue-specific complementation reveals an essential role in phloem loading but not in long-distance transport. *Plant Physiol* **148**: 200-211
- Sun Y, Reinders A, LaFleur KR, Mori T, Ward JM** (2010) Transport activity of rice sucrose transporters OsSUT1 and OsSUT5. *Plant Cell Physiol* **51**: 114-122

**Supplemental Table 2:** Oligonucleotides used to create the indicated SUT cDNA by PCR for TOPO directional cloning.

| cDNA          | Forward Primer (5'→3')             | Reverse Primer (5'→3')             |
|---------------|------------------------------------|------------------------------------|
| AtSUC2        | CACCATGGTCAGCCATCCAATGGAGAAAAGCTGC | ATGAAATCCCATAGTAGCTTTGAACGCAGGAGC  |
| NtSUT3        | CACCATGGAGAGTGGTAGTATGGGAATG       | AAACTTGTTTTGTGATGTCCAGTATTTTGTGTC  |
| <i>LeSUT2</i> | CACCATGGATGCGGTATCGATCAGAGTACCGT   | ACCAAAATGGAAGCCAGTTGATTTG          |
| LeSUT4        | CACCATGCCGGAGATAGAAAGGCATAGAACAAGG | TGCAAAGATCTTGGGTCTCTCAACCCGGTGTTCG |
| LeSUT1        | CACCATGGAGAATGGTACAAAAGGGAAACT     | AATGGAAACCGCCCATGGCGACTGCTGG       |

**Supplemental Table 3:** Oligonucleotides used for RT-qPCR analysis of expression for the indicated genes

| cDNA         | Forward Primer (5'→3')  | Reverse Primer (5'→3')     |
|--------------|-------------------------|----------------------------|
| AtSUC1       | GTCGTCCTTTCATCGCCACC    | TTGTTGGCTACGTCGAGGAT       |
| AtSUC2       | TAGCCATTGTTCGTCCTCAGATG | ATGAAATCCCATAGTAGCTTTGAAGG |
| AtSUC3       | TTCGGCTGATGGTGAATCTGTGT | AAGCATGCGATATTCCAAGGGTCT   |
| AtSUC9       | CCCTTCCTACCAATGCCATCAGA | GGCACCGGAACTGCTTGAAATAATG  |
| EF1 $\alpha$ | GAGCCCAAGTTTTTGAAGA     | CTAACAGCGAAACGTCCCA        |
| LeSUT1       | CCATAGCTGCTGGTGTTCAA    | ACCAGAAATGGGTCCACAAA       |
| LeSUT2       | CCGCTATCATTAGCGTGGTT    | GCAAGAGGAATGCCAAGAAG       |
| LeSUT4       | CAGCCTCTAGATCCCAGTCG    | ACAAGCAGGATCACCCAAAC       |
| NtSUT3       | CAGAAGCCTGTGGTGTTCAA    | TGATCTTTCTGTGGCAGCAC       |
| PAP14        | TGTGCGAGACAAGTGACGTGG   | GATTCGATCGCAGGAGCAAA       |
| PAP24        | CCACCAATGATTGGTATGGCA   | AGGCTTTCTCTTCCCATAGGCT     |
| PHT2;1       | CATTCTCCAAAACGGAGCAG    | CGAGAACATCCATTGGGATAA      |
| PT2          | CGAAGCTCCTCGGTCGTAT     | GGAGAGTCCCAGGCTTTTGT       |
| ZmSUT1       | AGACGCAGGCCATTTATCC     | GGAGAAGTCAAGGAGCCAAA       |
